# Supplementary material for: Bacterial Superantigens Promote Acute Nasopharyngeal Infection by Streptococcus pyogenes in a Human MHC Class II-Dependent Manner
Source: PubMed Central journal article supplement (PMC4038607; doi:10.1371/journal.ppat.1004155), 2014-05-29
Supplement: ppat.1004155.s002.pdf [file ppat.1004155.s002.pdf]

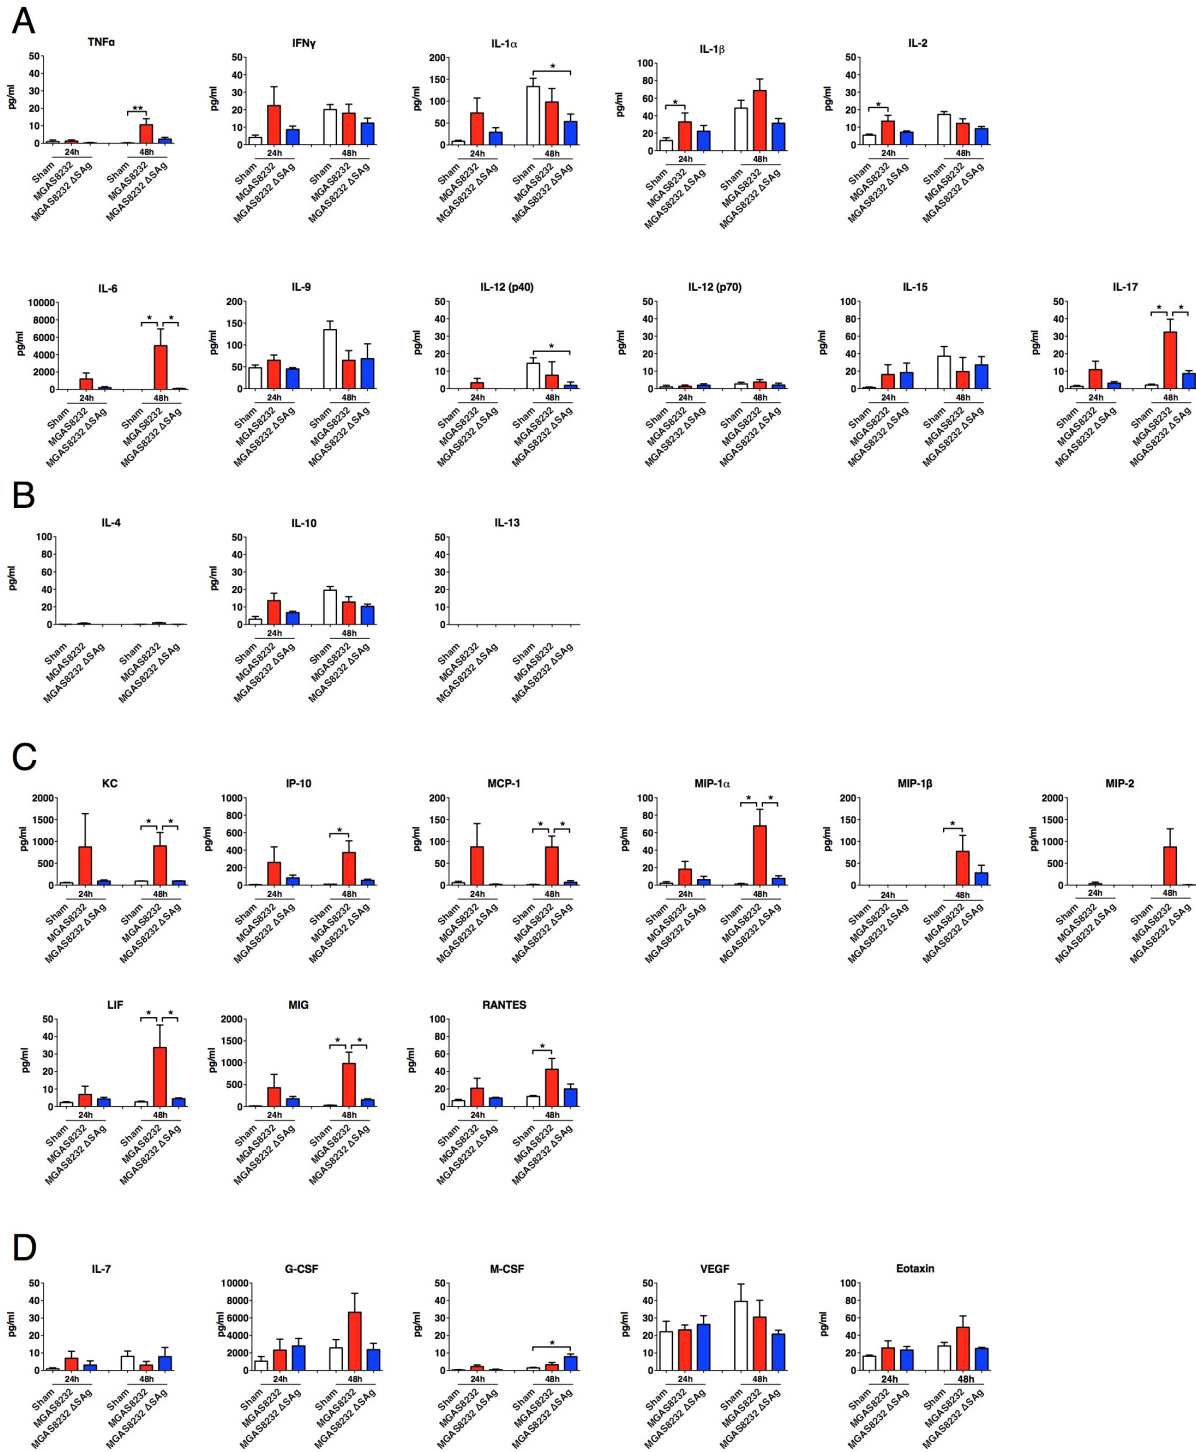

Kasper *et al.*, Figure S2
