# Supplementary material for: Bacterial Superantigens Promote Acute Nasopharyngeal Infection by Streptococcus pyogenes in a Human MHC Class II-Dependent Manner
Source: PubMed Central journal article supplement (PMC4038607; doi:10.1371/journal.ppat.1004155), 2014-05-29
Supplement: ppat.1004155.s003.pdf [file ppat.1004155.s003.pdf]

**Table S1. Primers used in this study.**

| <b>Primer Name</b>                                          | <b>Sequence (5'-3')<sup>a</sup></b>                                                   |
|-------------------------------------------------------------|---------------------------------------------------------------------------------------|
| <b>Primers for SAg expression constructs</b>                |                                                                                       |
| NcoI-His-TEV-SpeA For                                       | CCCCCATGGGCAGCAGCCATCATCATCATCACAGCAGCGGCGAAAACCTGTATTTCCAAGGCCAACAGACCCCGATCCAAGCCA  |
| BamHI-SpeA Rev                                              | CCCGGATCCTTACTTGGTTGTTAGGTAGACTTCAAT                                                  |
| SpeA-Y100A For                                              | AGTGCATGTATCGCCGGAGGGGTAACA                                                           |
| NcoI-His-TEV-SpeG For                                       | CCCCCATGGGCAGCAGCCATCATCATCATCACAGCAGCGGCGAAAACCTGTATTTCCAAGCGATGAAAATTTAAAAGATTTAAAA |
| BamHI-SpeG Rev                                              | CCCGGATCCCTAGTACGTTTTTAAGTAGATATCAAA                                                  |
| NcoI-SpeL-Forward                                           | GGGCCATGGGCAGCAGCCATCATCATCATCACAGCAGCGGCGAAAACCTGTATTTCCAAAGTGAAGAGACTATTAATTAAGGAT  |
| BamHI-SpeL-Reverse                                          | GGGGGATCCTTATTTATTAATTTAACTAAGTA                                                      |
| NcoI-SpeM-Forward                                           | GGGCCATGGGCAGCAGCCATCATCATCATCACAGCAGCGGCGAAAACCTGTATTTCCAAAGTATGCTGTGTTGTTAATAGCGAA  |
| BamHI-SpeM-Reverse                                          | GGGGGATCCCTAATTTTTAGAAAAATCTTCGTT                                                     |
| SmeZ-TEV-KpnI For                                           | CCCGGTACCGGTGGTGGCTCCGGTAAAACTGTATTTCCAAGGCTTAGAAGTAGATAATAATTC                       |
| SmeZ-BamHI Rev                                              | CCCGGATCCTTAGGAGTCAATTTCTATATC                                                        |
| <b>Primers for SAg gene chromosomal deletion constructs</b> |                                                                                       |
| BamHI-upstream speA MGAS8232 For                            | CCCGGATCCGCCAAGTTATGCCATTACTGTGTTG                                                    |
| PstI-upstream speA MGAS8232 Rev                             | CCCCTGCAGGAAGTCTACCTAACACCAAGTAA                                                      |
| PstI-downstream speA MGAS8232 For                           | CCCCTGCAGCAACTTTTTTATTGTTTTCCATTAATAT                                                 |
| KpnI-downstream speA MGAS8232 Rev                           | CCCGGTACCGCAAATGACAAATCGCTATATCAATAA                                                  |
| PstI-downstream speC MGAS8232 For                           | CCCCTGCAGTTTGATGATGTTAATCTTTTTCAT                                                     |
| KpnI-downstream speC MGAS8232 Rev                           | CCCGGTACCGGATATCAATTTTGTGGATTAACG                                                     |
| BamHI-upstream speC MGAS8232 For                            | CCCGGATCCCGGTTACCCATGCGCACTGTCC                                                       |
| PstI-upstream speC MGAS8232 Rev                             | CCCCTGCAGTTCGATATTTATCTTGAAAAATAATTCATC                                               |
| BamHI-upstream speG MGAS8232 For                            | CCCGGATCCGCCAGCTTCAAGACGTTGGTTAA                                                      |
| PstI-upstream speG MGAS8232 Rev                             | CCCCTGCAGAAATCTAAAATGAACCTAGCCAC                                                      |
| PstI-downstream speG MGAS8232 For                           | CCCCTGCAGGATATCTACTTAAAAACGCACTAG                                                     |
| KpnI-downstream speG MGAS8232 Rev                           | CCCGGTACCGGAAGATCAAGCCAACCAAGAAA                                                      |
| BamHI-upstream speL/M MGAS8232 For                          | CCCGGATCCCTATGGACGTAGACAAATATGTTG                                                     |
| PstI-upstream speL/M MGAS8232 Rev                           | CCCCTGCAGTTATTACAAACAAAGAAAATTAATTAGTA                                                |
| PstI-downstream speL/M MGAS8232 For                         | CCCCTGCAGCAAAGTCAAGGTATTTTTTTTCAT                                                     |
| KpnI-downstream speL/M MGAS8232 Rev                         | CGCGGTACCGGTGTATTGACATTGATGTATT                                                       |
| BamHI-upstream smeZ MGAS8232 For                            | GGGGGATCCGGGGAATTATGCCAATTGTCTCTA                                                     |
| PstI-upstream smeZ MGAS8232 Rev                             | CCCCTGCAGAAAAATAAGTTTTGTTTTTTTCATAAATAG                                               |
| PstI-downstream smeZ MGAS8232 For                           | CCCCTGCAGTTAGATATAGAAATTGACTCCTAATTC                                                  |
| KpnI-downstream smeZ MGAS8232 Rev                           | GGGGGTACCGGGCAATTGTTTAACTGGTTAATTAG                                                   |

### Primers for the SpeA and SpeA<sub>V100A</sub> complementation constructs

|                    |                                                                              |
|--------------------|------------------------------------------------------------------------------|
| KpnI-tsf For       | GGGGGGGTACCACCTTGCTCAATTGAACCACG                                             |
| EcoRI-MCS-tsf Rev  | TTTTTTGAATTCGATATCAAGCTTATCGATACCGTCGACCTCGAGGGGGGGCCCTCCGTTTGACACAACAAAAAGA |
| EcoRI-MCS-pepO For | GGGGGGGAATTCCTGCAGCCGGGGGATCCACTAGTTCTAGACACCAATAAGGAAGCAAAAA                |
| NotI-pepO Rev      | GGGGGGGCGGCCGAGCCTAAATGATTGGTGGA                                             |
| SpeI-speA Comp For | GGGGGGACTAGTATTTTATAATAAAATTATTAATATAAGTTAA                                  |
| Sall-speA Comp Rev | GGGGGGGTCGACAAAACCGCTCATCAAATGA                                              |

### Screening and sequencing primers for genomic integrations

|                         |                           |
|-------------------------|---------------------------|
| Int/Screen speA For     | GCAAGCTACGGTTACGAAATTG    |
| speA Screen II 8232 Rev | CCATCCTTTTTGATTCTCC       |
| speC Int II For         | GCAAAGCACTGGTTCGATGT      |
| speC Int II Rev         | GGATAACCTTAACCGCGCTAC     |
| speG int II For         | GCCCTCGTCAGAATGACTGT      |
| speG Screen II Rev      | CCGATACCGATCACCAAG        |
| speL/M Int II For       | GGCTTGAGTTATGTGTCTTTA     |
| speL/M Screen II Rev    | GTTTGGTGGTATAGATGTAGCAAGG |
| smeZ Int II For         | CATGCCTGCTCAAACAAGATT     |
| smeZ Screen II Rev      | ATACGACTCCATCTCATTATAGC   |

### Superantigen gene internal screening primers.

|             |                          |
|-------------|--------------------------|
| speA RT For | AAAGTTGCCATCTCTGGTTC     |
| speA RT Rev | CAAGAGGTATTTGCTCAACAAGAC |
| speC RT For | TTTGAGCAGGCGTAATTCCT     |
| speC RT Rev | TTCAACGACACACACATTAACA   |
| speG RT For | ACCCCATGCGATTATGAAAA     |
| speG RT Rev | GGGAGACCAAAAACATCGAC     |
| speL RT For | ATAAGTCAGCACCTTCTCTTTC   |
| speL RT Rev | AAATCTCCGTTACCTTCCA      |
| speM RT For | AACTTCTTCTCTTAAAGCGTCT   |
| speM RT Rev | TGCTGTGTTGGTTAATAGCGA    |
| smeZ RT For | TTTCTCGTCTGTGATTGGA      |
| smeZ RT Rev | AATGGGACGGAGAACATAGC     |

### Mouse genotyping primers

|                 |                                  |
|-----------------|----------------------------------|
| DQA (1027) For  | GAAGACATTGTGGCTGACCATGTTGCC      |
| DQA (1029) Rev  | AGCACAGCGATGTTTGTCAAGTCAAATTGCGG |
| DQ8b (vA) For1  | AGGATTTGGTGTACCAAGTTAAGGGCAT     |
| DQ8b (vT) For 2 | AGGATTTGGTGTCCAGTTAAGGGCAT       |

|                 |                        |
|-----------------|------------------------|
| DQ8b (vii) Rev  | TGCAAGGTCGTGCGGAGCTCAA |
| DR4A (1101) For | GGAGATAGTGGAACTTGCGG   |
| DR4A (1104) Rev | CCGATCACCAATGTACCTCC   |
| DR4B (1098) For | GTTTCTGGAGCAGGTAAACA   |
| DR4B (1099) Rev | CTGCACTGTGAAGCTCTCAC   |

---

<sup>a</sup> Underlined sequences in primers indicate restriction endonuclease sites used for cloning purposes.
